# Supplementary material
Source: publisher site journal article supplement (https://www.spandidos-publications.com/8228/downloadSupplementary)
Supplement: Supplementary file 1 [file downloadSupplementary]

**Table SI.** List of antibodies.

| <b>Antibody</b>                              | <b>Manufacturer</b>                     | <b>Cat. no.</b> | <b>Dilution</b> |
|----------------------------------------------|-----------------------------------------|-----------------|-----------------|
| anti-p21                                     | Proteintech Group, Inc.                 | 82669-2-RR      | 1:2,000         |
| anti-CDK4                                    | Proteintech Group, Inc.                 | 11026-1-AP      | 1:4,000         |
| anti-Cyclin D1                               | Proteintech Group, Inc.                 | 26939-1-AP      | 1:12,000        |
| anti-RB                                      | Proteintech Group, Inc.                 | 10048-2-Ig      | 1:10,000        |
| anti-Phospho-RB                              | Proteintech Group, Inc.                 | 84692-1-RR      | 1:4,000         |
| anti-NR4A1                                   | Proteintech Group, Inc.                 | 25851-1-AP      | 1:2,000         |
| anti-AKT                                     | Shanghai Abways Biotechnology Co., Ltd. | CY5551          | 1:1,000         |
| anti-Phospho-AKT                             | Shanghai Abways Biotechnology Co., Ltd. | CY6569          | 1:50,000        |
| anti-GAPDH                                   | Proteintech Group, Inc.                 | 60004-1-Ig      | 1:20,000        |
| anti- $\beta$ actin                          | Proteintech Group, Inc.                 | 66009-1-Ig      | 1:10,000        |
| HRP-conjugated Goat<br>Anti-Rabbit IgG (H+L) | Proteintech Group, Inc.                 | SA00001-2       | 1:10,000        |
| HRP-conjugated Goat<br>Anti-Mouse IgG (H+L)  | Proteintech Group, Inc.                 | SA00001-1       | 1:2,000         |

**Table SII.** Sequences of primers used for reverse transcription-quantitative PCR.

| <b>Gene name</b>      | <b>Primer sequence (5'-3')</b>                                           |
|-----------------------|--------------------------------------------------------------------------|
| Human-GAPDH           | Sense: GGAAGCTTGTCATCAATGGAAATC<br>Antisense: TGATGACCCTTTTGGCTCCC       |
| Human- $\beta$ -actin | Sense: CACCCAGCACAATGAAGATCAAGAT<br>Antisense: CCAGTTTTTAAATCCTGAGTCAAGC |
| Human-IL-6            | Sense: ATGAGGAGACTTGCCTGGTGAA<br>Antisense: CTCTGGCTTGTTCTCACTACTCTC     |
| Human-IL-8            | Sense: CAGTTTTGCCAAGGAGTGCTAA<br>Antisense: AAAGTTCTCCACAACCCTCTGC       |
| Human-IL-1 $\beta$    | Sense: TACCTGTCCTGCGTGTTGAAA<br>Antisense: GGTGCTGATGTACCAGTTGGG         |
| Human-NR4A1           | Sense: GCTTCGGGGACTGGATTGA<br>Antisense: GGTGATGAGGACAAGGGCAGA           |
| Human-HK2             | Sense: GACTTCCGCACAGAATTTGATG<br>Antisense: GAATGTTACGGACAATCTCACCC      |
| Human-LDHA            | Sense: CGTGGCTTGGAAGATAAGTGGT<br>Antisense: CAGAGAGACACCAGCAACATTCA      |

LDHA, lactate dehydrogenase A; HK2, hexokinase 2; IL, interleukin.
